# Supplementary material for: Determinants of bone damage: An ex-vivo study on porcine vertebrae
Source: PubMed Central journal article supplement (PMC6095531; doi:10.1371/journal.pone.0202210), 2018-08-16
Supplement: pone.0202210.s003.pdf [file pone.0202210.s003.pdf]

**S2 Table. Morphometric properties of the trabecular porcine specimen before damage testing. Data are presented as a mean  $\pm$  standard deviation. Mean, and the standard deviation was calculated from the pooled data as no significant difference was found between morphological parameters of samples between different vertebra locations.**

| Morphometric properties        | Value           |
|--------------------------------|-----------------|
| Bone volume to total volume    | 41.38 $\pm$     |
| (BV/TV) [%]                    | 4.54            |
| Trabecular Thickness (Tb. Th.) | 0.26 $\pm$ 0.12 |
| [mm]                           |                 |
| Trabecular Spacing (Tb. Sp.)   | 0.44 $\pm$ 0.17 |
| [mm]                           |                 |
| Bone surface to bone volume    | 10.64 $\pm$     |
| (BS/BV) [1/ mm]                | 0.99            |
| Bone surface to total volume   | 4.37 $\pm$ 0.35 |
| (BS/TV) [1/mm]                 |                 |
| Degree of Anisotropy (DA)      | 0.56 $\pm$ 0.09 |
| $m_1$                          | 0.60 $\pm$ 0.10 |
| $m_2$                          | 1.03 $\pm$ 0.11 |
| $m_3$                          | 1.38 $\pm$ 0.07 |
