# Supplementary material for: Determinants of bone damage: An ex-vivo study on porcine vertebrae
Source: PubMed Central journal article supplement (PMC6095531; doi:10.1371/journal.pone.0202210), 2018-08-16
Supplement: pone.0202210.s004.pdf [file pone.0202210.s004.pdf]

**S3 Table. Mechanical properties of trabecular porcine specimens. No significant difference was found between mechanical properties within vertebra for different spines. Therefore, mechanical properties were pooled and presented as a mean  $\pm$  standard deviation.**

| Mechanical properties                    | Value            |
|------------------------------------------|------------------|
| Initial elastic modulus, $E_0$           | 1558.90 $\pm$    |
| [MPa]                                    | 441.59           |
| Yield stress, $\sigma_y$ [MPa]           | 12.43 $\pm$ 3.37 |
| Yield strain, $\varepsilon_y$ [%]        | 1.03 $\pm$ 0.17  |
| Strength, $\sigma_{ult}$ [MPa]           | 14.76 $\pm$ 2.78 |
| Ultimate strain, $\varepsilon_{ult}$ [%] | 1.71 $\pm$ 0.49  |
